# Supplementary material for: Gold nanoparticle doped hollow SnO2 supersymmetric nanostructures for improved photocatalysis
Source: Royal Society of Chemistry journal article supplement (doi:10.1039/c3ta01099f), 2013-01-01
Supplement: c3ta01099f.pdf [file c3ta01099f.pdf]

# Supporting Information

## Gold Nanoparticle Doped Hollow SnO<sub>2</sub> Supersymmetric Nanostructures for Improved Photocatalyst

Hongjun You,<sup>a</sup> Rui Liu,<sup>b</sup> Congcong Liang,<sup>a</sup> Shengchun Yang,<sup>a\*</sup> Fei Wang,<sup>a\*</sup>

Xuegang Lu,<sup>a</sup> and Bingjun Ding<sup>a</sup>

<sup>a</sup> MOE Key Laboratory for Non-equilibrium Synthesis and Modulation of Condensed Matter,

School of Science, Xi'an Jiaotong University, Shanxi 710049, P. R. China

<sup>b</sup> School of Chemistry and Chemical Engineering, Shanxi Datong University, Shanxi 037009, P. R.

China

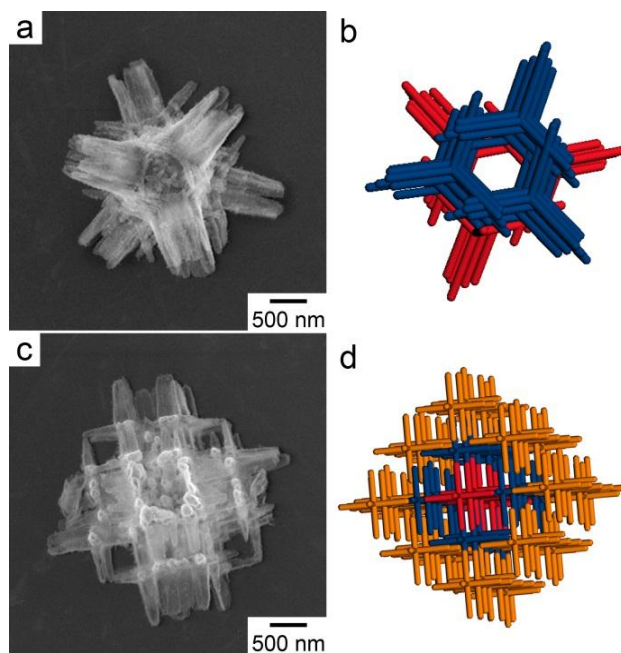

**Fig. S1** Two kinds of self-assembly behavior of uniform hollow SnO<sub>2</sub> hexapods and their correlated schematic images. (a,b) The extension of the pods presents a staggered form. (c,d) The stretch of the branches is perpendicular to the stem.

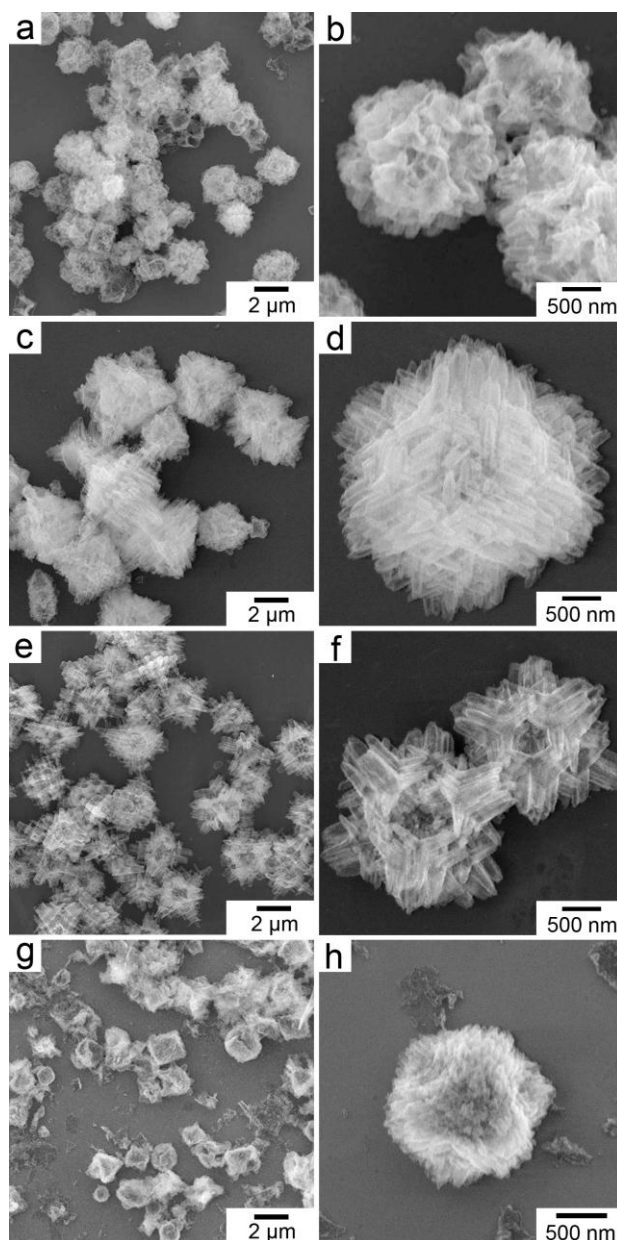

**Fig. S2** SEM images of SnO<sub>2</sub> particles synthesized with different amount of PEG: (a,b) without PEG, (c,d) 0.25 g PEG, (e,f) 1 g PEG, and (g,h) 2 g, PEG.

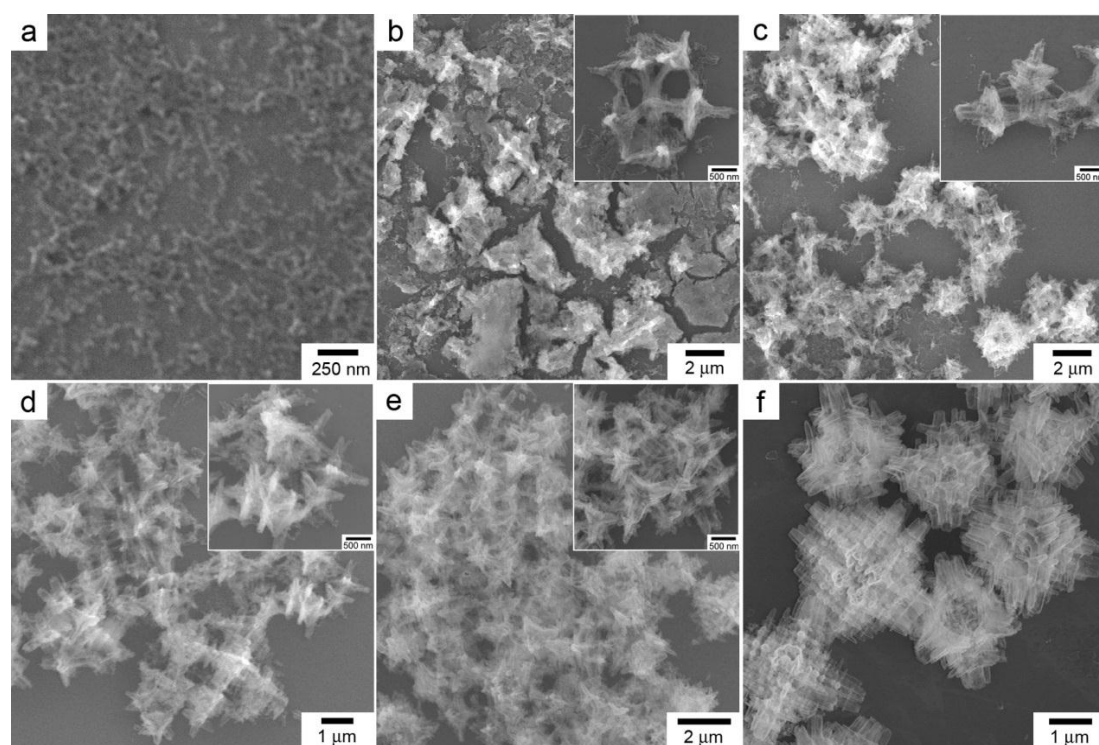

**Fig. S3** SEM images of the samples synthesized under different reaction times: (a), 0 min; (b), 1 min; (c), 3 min; (d), 10 min; (e), 15 min and (f), 40 min. The inserts in (b)-(e) show the enlarged images of the corresponding samples.

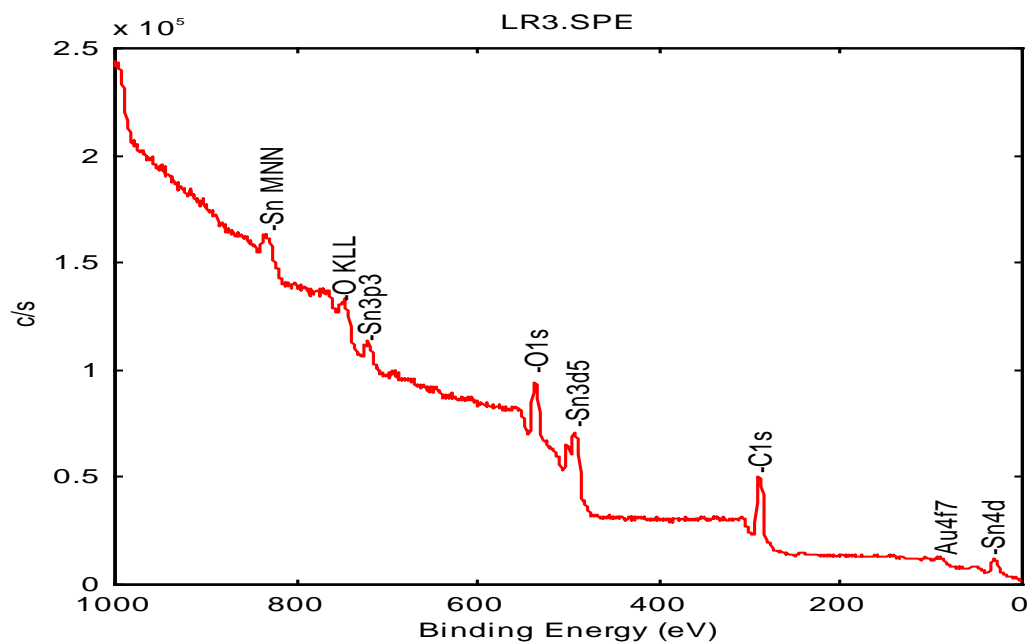

**Fig. S4** XPS survey scan of Au-SnO<sub>2</sub> composites.

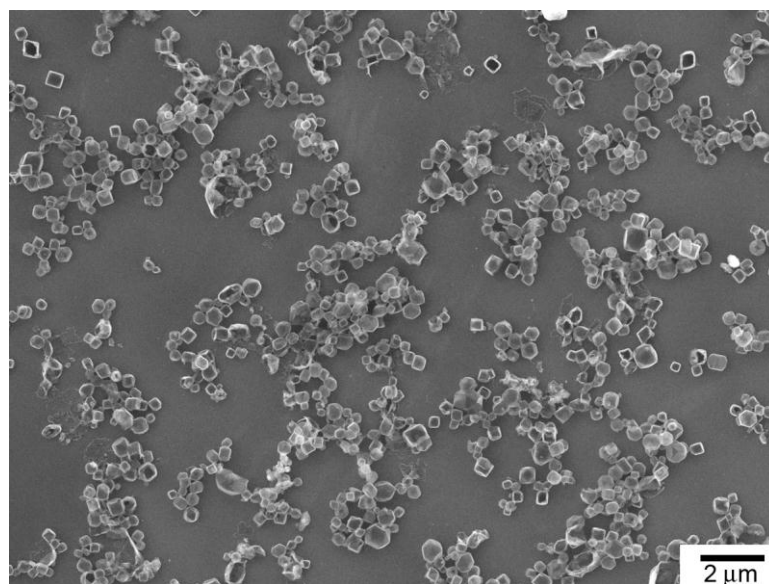

**Fig. S5** SEM and TEM images of hollow SnO<sub>2</sub> nanocube.

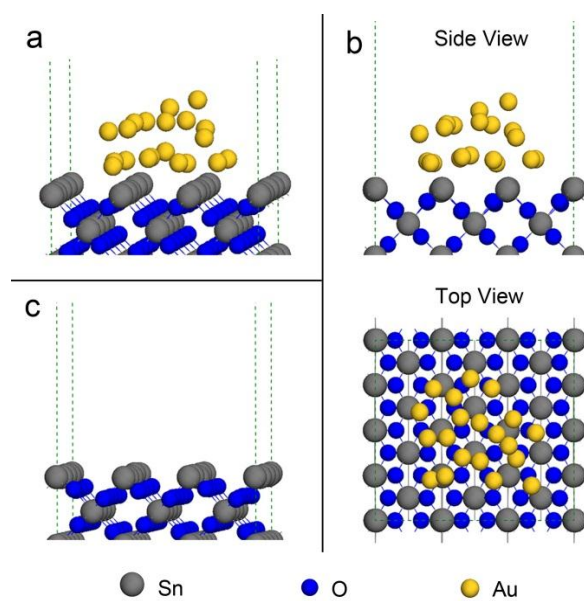

**Fig. S6** Structure modes for DFT calculation. SnO<sub>2</sub> (100) crystal facet loaded (a, b) with Au nanoparticle and (c) without Au nanoparticle in a periodical cell. (b) Side and top views of (a).
